# Supplementary material
Source: PubMed Central journal article supplement (PMC4655123)
Supplement: NIHMS726581-supplement-1.pdf [file NIHMS726581-supplement-1.pdf]

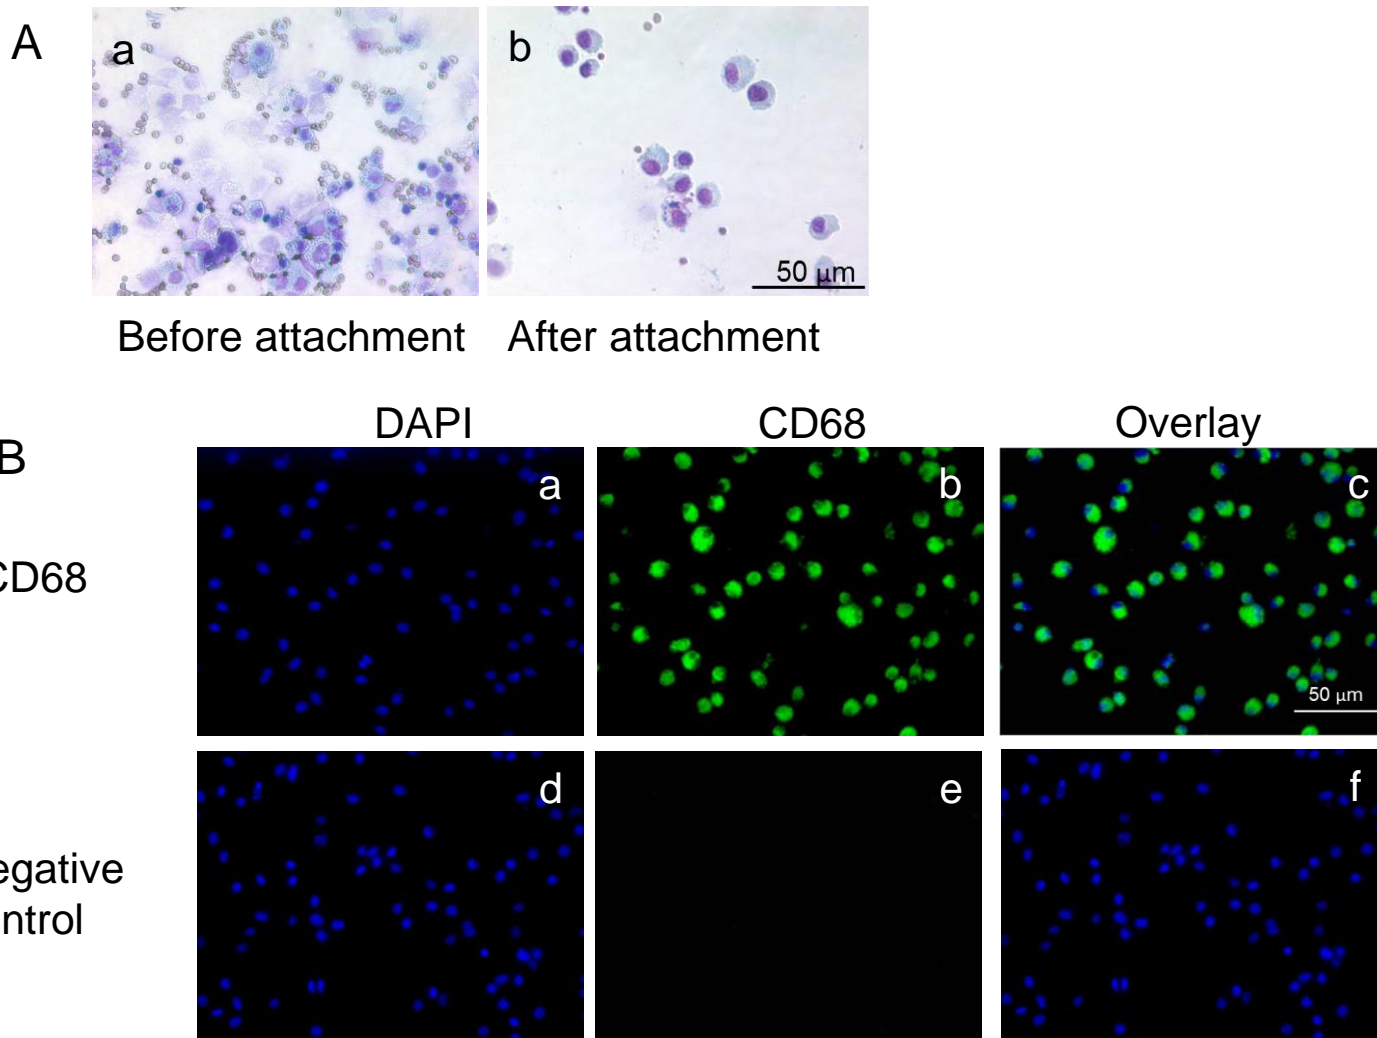

**Supplementary Fig. 1 Identification of bAMs by Wright's Giemsa and immunostaining.**

(A) Wright's Giemsa staining. bAMs were identified by their large, nonlobulated, and dark nuclei and large amounts of cytoplasm. (B) Immunostaining using antibodies against the cell surface antigen CD68 for macrophages of the attached bAMs. Upper panels, CD68 antibody; Lower panels: negative control without the primary antibody. Scale bar is 50  $\mu$ m.
